# Supplementary material
Source: PubMed Central journal article supplement (PMC6360356)

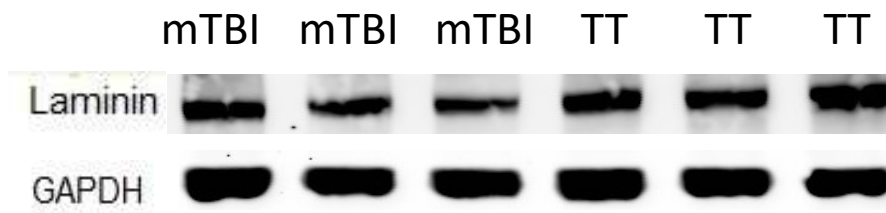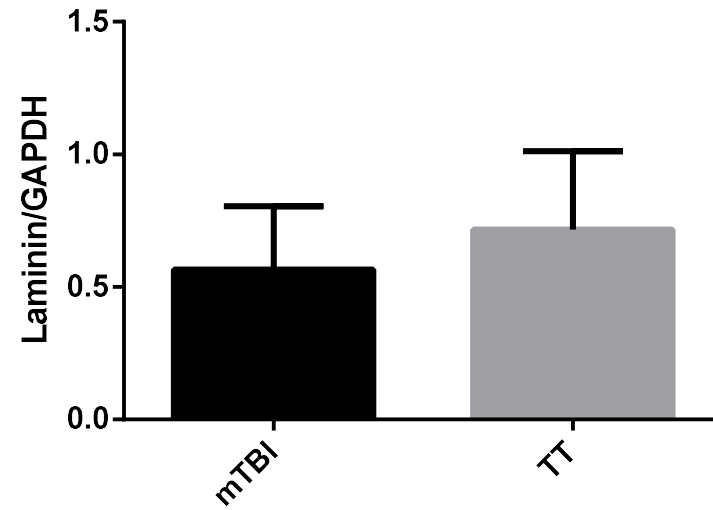

Supplemental 1.

Supplement: mmc1.pdf [file mmc1.pdf]

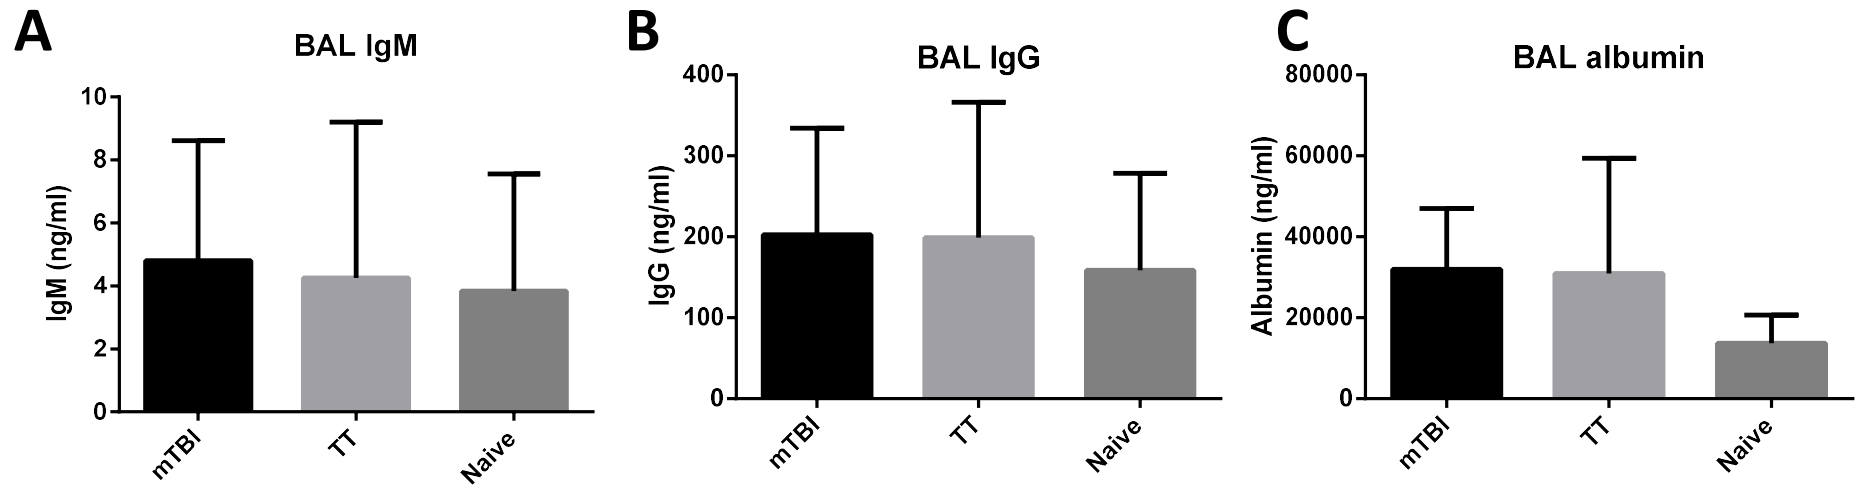

Supplemental 2.

Supplement: mmc2.pdf [file mmc2.pdf]
